# Supplementary material for: Supplementation of banana peel powder for the development of functional broiler nuggets
Source: PeerJ. 2022 Nov 29;10:e14364. doi: 10.7717/peerj.14364 (PMC9744146; doi:10.7717/peerj.14364)
Supplement: Supplemental Information 1 [file peerj-10-14364-s001.xlsx]

## Sheet: Sheet1
		1				2				3				4
	Moisture	To				T1				T2				T3
	Days	R1	R2	R3	Mean	R1	R2	R3	Mean	R1	R2	R3	Mean	R1	R2	R3	Mean
1	0	71.06	70.1	70.37	70.51	69.25	69.16	70.71	69.7067	67.82	69.16	69.09	68.69	68.33	67.1	67.39	67.6067
2	7	69	69.1	68	68.7	68.52	67.7	67.32	67.8467	65.68	66.39	66	66.0233	65.04	65	65.7	65.2467
3	14	67.96	66.13	69.52	67.87	66.56	67.32	66.43	66.77	65.68	65.39	66	65.69	64.3	65.98	64.7	64.9933
4	21	66.99	66.13	67.52	66.88	65.49	65.34	66.13	65.6533	65.37	64.8	64.46	64.8767	63.5	64.7	63.7	63.9667
			Treatment	Time	Replicates	Data
			1	1	1	71.06
			1	2	1	69
			1	3	1	67.96
			1	4	1	66.99
			1	1	2	70.1
			1	2	2	69.1
			1	3	2	66.13
			1	4	2	66.13
			1	1	3	70.37
			1	2	3	68
			1	3	3	69.52
			1	4	3	67.52
			2	1	1	69.25
			2	2	1	68.52
			2	3	1	66.56
			2	4	1	65.49
			2	1	2	69.16
			2	2	2	67.7
			2	3	2	67.32
			2	4	2	65.34
			2	1	3	70.71
			2	2	3	67.32
			2	3	3	66.43
			2	4	3	66.13
			3	1	1	67.82
			3	2	1	65.68
			3	3	1	65.68
			3	4	1	65.37
			3	1	2	69.16
			3	2	2	66.39
			3	3	2	65.39
			3	4	2	64.8
			3	1	3	69.09
			3	2	3	66
			3	3	3	66
			3	4	3	64.46
			4	1	1	68.33
			4	2	1	65.04
			4	3	1	64.3
			4	4	1	63.5
			4	1	2	67.1
			4	2	2	65
			4	3	2	65.98
			4	4	2	64.7
			4	1	3	67.39
			4	2	3	65.7
			4	3	3	64.7
			4	4	3	63.7
	Fat	To				T1				T2				T3
	Days	R1	R2	R3	Mean	R1	R2	R3	Mean	R1	R2	R3	Mean	R1	R2	R3	Mean
	0	9.27	9.24	9.24	9.25	7.34	7.35	7.37	7.35333	5.6	5.63	5.58	5.60333	4.52	4.5	4.52	4.51333
	7	9.26	9.25	9.24	9.25	7.33	7.35	7.33	7.33667	5.59	5.6	5.57	5.58667	4.5	4.52	4.5	4.50667
	14	9.23	9.24	9.26	9.24333	7.39	7.32	7.32	7.34333	5.59	5.6	5.59	5.59333	4.49	4.5	4.51	4.5
	21	9.23	9.24	9.21	9.22667	7.32	7.35	7.33	7.33333	5.56	5.58	5.59	5.57667	4.5	4.49	4.48	4.49
				Treatment	Time	Replicates	Data
				1	1	1	9.27
				1	2	1	9.26
				1	3	1	9.23
				1	4	1	9.23
				1	1	2	9.24
				1	2	2	9.25
				1	3	2	9.24
				1	4	2	9.24
				1	1	3	9.24
				1	2	3	9.24
				1	3	3	9.26
				1	4	3	9.21
				2	1	1	7.34
				2	2	1	7.33
				2	3	1	7.39
				2	4	1	7.32
				2	1	2	7.35
				2	2	2	7.35
				2	3	2	7.32
				2	4	2	7.35
				2	1	3	7.37
				2	2	3	7.33
				2	3	3	7.32
				2	4	3	7.33
				3	1	1	5.6
				3	2	1	5.59
				3	3	1	5.59
				3	4	1	5.56
				3	1	2	5.63
				3	2	2	5.6
				3	3	2	5.6
				3	4	2	5.58
				3	1	3	5.58
				3	2	3	5.57
				3	3	3	5.59
				3	4	3	5.59
				4	1	1	4.52
				4	2	1	4.5
				4	3	1	4.49
				4	4	1	4.5
				4	1	2	4.5
				4	2	2	4.52
				4	3	2	4.5
				4	4	2	4.49
				4	1	3	4.52
				4	2	3	4.5
				4	3	3	4.51
				4	4	3	4.48
	Ash	To				T1				T2				T3
	Days	R1	R2	R3	Mean	R1	R2	R3	Mean	R1	R2	R3	Mean	R1	R2	R3	Mean
	0	2.53	2.48	2.52	2.51	4.31	4.31	4.42	4.34667	5.54	5.5	5.6	5.54667	6.43	6.44	6.45	6.44
	7	2.53	2.54	2.49	2.52	4.34	4.42	4.33	4.36333	5.6	5.53	5.55	5.56	6.44	6.46	6.46	6.45333
	14	2.51	2.52	2.52	2.51667	4.37	4.37	4.36	4.36667	5.56	5.57	5.59	5.57333	6.45	6.45	6.44	6.44667
	21	2.53	2.53	2.52	2.52667	4.37	4.37	4.36	4.36667	5.57	5.58	5.58	5.57667	6.46	6.46	6.45	6.45667
				Treatment	Time	Replicates	Data
				1	1	1	2.53
				1	2	1	2.53
				1	3	1	2.51
				1	4	1	2.53
				1	1	2	2.48
				1	2	2	2.54
				1	3	2	2.52
				1	4	2	2.53
				1	1	3	2.52
				1	2	3	2.49
				1	3	3	2.52
				1	4	3	2.52
				2	1	1	4.31
				2	2	1	4.34
				2	3	1	4.37
				2	4	1	4.37
				2	1	2	4.31
				2	2	2	4.42
				2	3	2	4.37
				2	4	2	4.37
				2	1	3	4.42
				2	2	3	4.33
				2	3	3	4.36
				2	4	3	4.36
				3	1	1	5.54
				3	2	1	5.6
				3	3	1	5.56
				3	4	1	5.57
				3	1	2	5.5
				3	2	2	5.53
				3	3	2	5.57
				3	4	2	5.58
				3	1	3	5.6
				3	2	3	5.55
				3	3	3	5.59
				3	4	3	5.58
				4	1	1	6.43
				4	2	1	6.44
				4	3	1	6.45
				4	4	1	6.46
				4	1	2	6.44
				4	2	2	6.46
				4	3	2	6.45
				4	4	2	6.46
				4	1	3	6.45
				4	2	3	6.46
				4	3	3	6.44
				4	4	3	6.45
	Protein	To				T1				T2				T3
	Days	R1	R2	R3	Mean	R1	R2	R3	Mean	R1	R2	R3	Mean	R1	R2	R3	Mean
	0	13.73	13.7	13.7	13.71	12.8	12.81	12.83	12.8133	10.1	10.15	10.12	10.1233	8.93	8.9	8.93	8.92
	7	12.62	12.64	12.61	12.6233	11.77	11.79	11.77	11.7767	9.22	9.2	9.23	9.21667	7.85	7.82	7.83	7.83333
	14	11.71	11.7	11.73	11.7133	10.77	10.7	10.7	10.7233	8.1	8.12	8.13	8.11667	6.81	6.8	6.9	6.83667
	21	10.65	10.66	10.63	10.6467	9.66	9.69	9.67	9.67333	7.1	7	7.44	7.18	5.92	5.91	5.9	5.91
				Treatment	Time	Replicates	Data
				1	1	1	13.73
				1	2	1	12.62
				1	3	1	11.71
				1	4	1	10.65
				1	1	2	13.7
				1	2	2	12.64
				1	3	2	11.7
				1	4	2	10.66
				1	1	3	13.7
				1	2	3	12.61
				1	3	3	11.73
				1	4	3	10.63
				2	1	1	12.8
				2	2	1	11.77
				2	3	1	10.77
				2	4	1	9.66
				2	1	2	12.81
				2	2	2	11.79
				2	3	2	10.7
				2	4	2	9.69
				2	1	3	12.83
				2	2	3	11.77
				2	3	3	10.7
				2	4	3	9.67
				3	1	1	10.1
				3	2	1	9.22
				3	3	1	8.1
				3	4	1	7.1
				3	1	2	10.15
				3	2	2	9.2
				3	3	2	8.12
				3	4	2	7
				3	1	3	10.12
				3	2	3	9.23
				3	3	3	8.13
				3	4	3	7.44
				4	1	1	8.93
				4	2	1	7.85
				4	3	1	6.81
				4	4	1	5.92
				4	1	2	8.9
				4	2	2	7.82
				4	3	2	6.8
				4	4	2	5.91
				4	1	3	8.93
				4	2	3	7.83
				4	3	3	6.9
				4	4	3	5.9
	Fiber	To				T1				T2				T3
	Days	R1	R2	R3	Mean	R1	R2	R3	Mean	R1	R2	R3	Mean	R1	R2	R3	Mean
	0	0.51	0.52	0.51	0.513333	1	0.9	1	0.966667	1.61	1.65	1.62	1.62667	2.13	2.13	2.12	2.12667
	7	0.5	0.51	0.52	0.51	0.95	0.99	0.95	0.963333	1.6	1.62	1.63	1.61667	2.11	2.12	2.12	2.11667
	14	0.5	0.5	0.51	0.503333	0.96	0.94	0.97	0.956667	1.62	1.6	1.6	1.60667	2.11	2.1	2.11	2.10667
	21	0.51	0.5	0.5	0.503333	0.95	0.96	0.95	0.953333	1.6	1.61	1.6	1.60333	2	2.2	2.1	2.1
				Treatment	Time	Replicates	Data
				1	1	1	0.51
				1	2	1	0.5
				1	3	1	0.5
				1	4	1	0.51
				1	1	2	0.52
				1	2	2	0.51
				1	3	2	0.5
				1	4	2	0.5
				1	1	3	0.51
				1	2	3	0.52
				1	3	3	0.51
				1	4	3	0.5
				2	1	1	1
				2	2	1	0.95
				2	3	1	0.96
				2	4	1	0.95
				2	1	2	0.9
				2	2	2	0.99
				2	3	2	0.94
				2	4	2	0.96
				2	1	3	1
				2	2	3	0.95
				2	3	3	0.97
				2	4	3	0.95
				3	1	1	1.61
				3	2	1	1.6
				3	3	1	1.62
				3	4	1	1.6
				3	1	2	1.65
				3	2	2	1.62
				3	3	2	1.6
				3	4	2	1.61
				3	1	3	1.62
				3	2	3	1.63
				3	3	3	1.6
				3	4	3	1.6
				4	1	1	2.13
				4	2	1	2.11
				4	3	1	2.11
				4	4	1	2
				4	1	2	2.13
				4	2	2	2.12
				4	3	2	2.1
				4	4	2	2.2
				4	1	3	2.12
				4	2	3	2.12
				4	3	3	2.11
				4	4	3	2.1
	C.Y	To				T1				T2				T3
	Days	R1	R2	R3	To	R1	R2	R3	T1	R1	R2	R3	T2	R1	R2	R3	T3
	0	83	83.4	83.2	83.2	85.4	85.4	85	85.2667	87	86.8	86.8	86.8667	87.8	87.6	87.8	87.7333
	7	84.8	85	84.8	84.8667	86.6	86.6	86.8	86.6667	87.6	87.4	87.4	87.4667	88.4	88.6	88.2	88.4
	14	85.4	85.6	85.2	85.4	87.4	87.2	87	87.2	89	88.8	88.8	88.8667	89.8	89.8	89.6	89.7333
	21	86.8	87	86.8	86.8667	88.6	88.6	88.4	88.5333	89.6	89.6	89.8	89.6667	91	90.8	90.6	90.8
				Treatment	Time	Replicates	Data
				1	1	1	83
				1	2	1	84.8
				1	3	1	85.4
				1	4	1	86.8
				1	1	2	83.4
				1	2	2	85
				1	3	2	85.6
				1	4	2	87
				1	1	3	83.2
				1	2	3	84.8
				1	3	3	85.2
				1	4	3	86.8
				2	1	1	85.4
				2	2	1	86.6
				2	3	1	87.4
				2	4	1	88.6
				2	1	2	85.4
				2	2	2	86.6
				2	3	2	87.2
				2	4	2	88.6
				2	1	3	85
				2	2	3	86.8
				2	3	3	87
				2	4	3	88.4
				3	1	1	87
				3	2	1	87.6
				3	3	1	89
				3	4	1	89.6
				3	1	2	86.8
				3	2	2	87.4
				3	3	2	88.8
				3	4	2	89.6
				3	1	3	86.8
				3	2	3	87.4
				3	3	3	88.8
				3	4	3	89.8
				4	1	1	87.8
				4	2	1	88.4
				4	3	1	89.8
				4	4	1	91
				4	1	2	87.6
				4	2	2	88.6
				4	3	2	89.8
				4	4	2	90.8
				4	1	3	87.8
				4	2	3	88.2
				4	3	3	89.6
				4	4	3	90.6
	C.L	To				T1				T2				T3
	Days	R1	R2	R3	To	R1	R2	R3	T1	R1	R2	R3	T2	R1	R2	R3	T3
	0	20.48	19.9	20.19	20.19	17.1	17.1	17.65	17.2833	14.94	15.21	15.21	15.12	13.9	14.16	13.9	13.9867
	7	17.92	17.65	17.92	17.83	15.47	15.47	15.21	15.3833	14.16	14.42	14.42	14.3333	13.12	12.87	13.38	13.1233
	14	17.1	16.82	17.37	17.0967	14.42	14.68	14.94	14.68	12.36	12.61	12.61	12.5267	11.36	11.36	11.61	11.4433
	21	15.21	14.94	15.21	15.12	12.87	13.12	13.12	13.0367	11.61	11.61	11.36	11.5267	9.89	10.13	10.38	10.1333
				Treatment	Time	Replicates	Data
				1	1	1	20.48
				1	2	1	17.92
				1	3	1	17.1
				1	4	1	15.21
				1	1	2	19.9
				1	2	2	17.65
				1	3	2	16.82
				1	4	2	14.94
				1	1	3	20.19
				1	2	3	17.92
				1	3	3	17.37
				1	4	3	15.21
				2	1	1	17.1
				2	2	1	15.47
				2	3	1	14.42
				2	4	1	12.87
				2	1	2	17.1
				2	2	2	15.47
				2	3	2	14.68
				2	4	2	13.12
				2	1	3	17.65
				2	2	3	15.21
				2	3	3	14.94
				2	4	3	13.12
				3	1	1	14.94
				3	2	1	14.16
				3	3	1	12.36
				3	4	1	11.61
				3	1	2	15.21
				3	2	2	14.42
				3	3	2	12.61
				3	4	2	11.61
				3	1	3	15.21
				3	2	3	14.42
				3	3	3	12.61
				3	4	3	11.36
				4	1	1	13.9
				4	2	1	13.12
				4	3	1	11.36
				4	4	1	9.89
				4	1	2	14.16
				4	2	2	12.87
				4	3	2	11.36
				4	4	2	10.13
				4	1	3	13.9
				4	2	3	13.38
				4	3	3	11.61
				4	4	3	10.38
	TBA	To				T1				T2				T3
	Days	R1	R2	R3	To	R1	R2	R3	T1	R1	R2	R3	T2	R1	R2	R3	T3
	0	0.2	0.17	0.17	0.18	0.18	0.15	0.16	0.163333	0.13	0.15	0.18	0.153333	0.15	0.12	0.15	0.14
	7	0.55	0.53	0.54	0.54	0.23	0.25	0.23	0.236667	0.23	0.24	0.21	0.226667	0.21	0.21	0.23	0.216667
	14	1.01	1.02	1.04	1.02333	0.38	0.31	0.31	0.333333	0.32	0.33	0.32	0.323333	0.31	0.3	0.32	0.31
	21	1.52	1.54	1.55	1.53667	0.45	0.46	0.48	0.463333	0.44	0.45	0.43	0.44	0.45	0.46	0.44	0.45
				Treatment	Time	Replicates	Data
				1	1	1	0.2
				1	2	1	0.55
				1	3	1	1.01
				1	4	1	1.52
				1	1	2	0.17
				1	2	2	0.53
				1	3	2	1.02
				1	4	2	1.54
				1	1	3	0.17
				1	2	3	0.54
				1	3	3	1.04
				1	4	3	1.55
				2	1	1	0.18
				2	2	1	0.23
				2	3	1	0.38
				2	4	1	0.45
				2	1	2	0.15
				2	2	2	0.25
				2	3	2	0.31
				2	4	2	0.46
				2	1	3	0.16
				2	2	3	0.23
				2	3	3	0.31
				2	4	3	0.48
				3	1	1	0.13
				3	2	1	0.23
				3	3	1	0.32
				3	4	1	0.44
				3	1	2	0.15
				3	2	2	0.24
				3	3	2	0.33
				3	4	2	0.45
				3	1	3	0.18
				3	2	3	0.21
				3	3	3	0.32
				3	4	3	0.43
				4	1	1	0.15
				4	2	1	0.21
				4	3	1	0.31
				4	4	1	0.45
				4	1	2	0.12
				4	2	2	0.21
				4	3	2	0.3
				4	4	2	0.46
				4	1	3	0.15
				4	2	3	0.23
				4	3	3	0.32
				4	4	3	0.44
	TPC	To				T1				T2				T3
	Days	R1	R2	R3	To	R1	R2	R3	T1	R1	R2	R3	T2	R1	R2	R3	T3
	0	3.72	3.72	3.75	3.73	6.12	6.15	6.13	6.13333	7.26	7.22	7.23	7.23667	8.51	8.54	8.54	8.53
	7	3.19	4.11	3.48	3.59333	5.61	5.61	5.63	5.61667	6.76	6.78	6.79	6.77667	7.99	8	7.98	7.99
	14	2.74	2.73	2.76	2.74333	5.07	5.07	5.12	5.08667	6.21	6.23	6.24	6.22667	7.76	7.77	7.74	7.75667
	21	2.21	2.22	2.19	2.20667	4.56	4.57	4.59	4.57333	5.49	5.58	5.93	5.66667	7.04	7.05	7.03	7.04
				Treatment	Time	Replicates	Data
				1	1	1	3.72
				1	2	1	3.19
				1	3	1	2.74
				1	4	1	2.21
				1	1	2	3.72
				1	2	2	4.11
				1	3	2	2.73
				1	4	2	2.22
				1	1	3	3.75
				1	2	3	3.48
				1	3	3	2.76
				1	4	3	2.19
				2	1	1	6.12
				2	2	1	5.61
				2	3	1	5.07
				2	4	1	4.56
				2	1	2	6.15
				2	2	2	5.61
				2	3	2	5.07
				2	4	2	4.57
				2	1	3	6.13
				2	2	3	5.63
				2	3	3	5.12
				2	4	3	4.59
				3	1	1	7.26
				3	2	1	6.76
				3	3	1	6.21
				3	4	1	5.49
				3	1	2	7.22
				3	2	2	6.78
				3	3	2	6.23
				3	4	2	5.58
				3	1	3	7.23
				3	2	3	6.79
				3	3	3	6.24
				3	4	3	5.93
				4	1	1	8.51
				4	2	1	7.99
				4	3	1	7.76
				4	4	1	7.04
				4	1	2	8.54
				4	2	2	8
				4	3	2	7.77
				4	4	2	7.05
				4	1	3	8.54
				4	2	3	7.98
				4	3	3	7.74
				4	4	3	7.03
	Microbial	To				T1				T2				T3
	Days	R1	R2	R3	To	R1	R2	R3	T1	R1	R2	R3	T2	R1	R2	R3	T3
	0	2.82	2.81	2.81	2.81333	2.77	2.74	2.75	2.75333	2.53	2.51	2.5	2.51333	2.37	2.36	2.36	2.36333
	7	3.63	3.65	3.62	3.63333	3.08	3	3.08	3.05333	2.97	2.96	2.97	2.96667	2.86	2.83	2.84	2.84333
	14	4.72	4.71	4.74	4.72333	3.98	3.98	3.91	3.95667	3.11	3.13	3.14	3.12667	3.12	3.11	3.2	3.14333
	21	5.66	5.67	5.64	5.65667	4.07	4.09	4.08	4.08	3.9	3.76	3.77	3.81	3.93	3.92	3.91	3.92
				Treatment	Time	Replicates	Data
				1	1	1	2.82
				1	2	1	3.63
				1	3	1	4.72
				1	4	1	5.66
				1	1	2	2.81
				1	2	2	3.65
				1	3	2	4.71
				1	4	2	5.67
				1	1	3	2.81
				1	2	3	3.62
				1	3	3	4.74
				1	4	3	5.64
				2	1	1	2.77
				2	2	1	3.08
				2	3	1	3.98
				2	4	1	4.07
				2	1	2	2.74
				2	2	2	3
				2	3	2	3.98
				2	4	2	4.09
				2	1	3	2.75
				2	2	3	3.08
				2	3	3	3.91
				2	4	3	4.08
				3	1	1	2.53
				3	2	1	2.97
				3	3	1	3.11
				3	4	1	3.9
				3	1	2	2.51
				3	2	2	2.96
				3	3	2	3.13
				3	4	2	3.76
				3	1	3	2.5
				3	2	3	2.97
				3	3	3	3.14
				3	4	3	3.77
				4	1	1	2.37
				4	2	1	2.86
				4	3	1	3.12
				4	4	1	3.93
				4	1	2	2.36
				4	2	2	2.83
				4	3	2	3.11
				4	4	2	3.92
				4	1	3	2.36
				4	2	3	2.84
				4	3	3	3.2
				4	4	3	3.91
	WHC	To				T1				T2				T3
	Days	R1	R2	R3	Mean	R1	R2	R3	Mean	R1	R2	R3	Mean	R1	R2	R3	Mean
	0	6.73	6.7	6.7	6.71	7.8	7.81	7.83	7.81333	8.1	8.15	8.12	8.12333	9.93	9.9	9.93	9.92
	7	5.62	5.64	5.61	5.62333	6.77	6.79	6.77	6.77667	7.22	7.2	7.23	7.21667	8.85	8.82	8.83	8.83333
	14	4.71	4.7	4.73	4.71333	5.77	5.7	5.7	5.72333	6.1	6.12	6.13	6.11667	7.81	7.8	7.9	7.83667
	21	3.65	3.66	3.63	3.64667	4.66	4.69	4.67	4.67333	5.1	5	5.44	5.18	6.92	6.91	6.9	6.91
					Treatment	Time	Replicates	data
					1	1	1	6.73
					1	2	1	5.62
					1	3	1	4.71
					1	4	1	3.65
					1	1	2	6.7
					1	2	2	5.64
					1	3	2	4.7
					1	4	2	3.66
					1	1	3	6.7
					1	2	3	5.61
					1	3	3	4.73
					1	4	3	3.63
					2	1	1	7.8
					2	2	1	6.77
					2	3	1	5.77
					2	4	1	4.66
					2	1	2	7.81
					2	2	2	6.79
					2	3	2	5.7
					2	4	2	4.69
					2	1	3	7.83
					2	2	3	6.77
					2	3	3	5.7
					2	4	3	4.67
					3	1	1	8.1
					3	2	1	7.22
					3	3	1	6.1
					3	4	1	5.1
					3	1	2	8.15
					3	2	2	7.2
					3	3	2	6.12
					3	4	2	5
					3	1	3	8.12
					3	2	3	7.23
					3	3	3	6.13
					3	4	3	5.44
					4	1	1	9.93
					4	2	1	8.85
					4	3	1	7.81
					4	4	1	6.92
					4	1	2	9.9
					4	2	2	8.82
					4	3	2	7.8
					4	4	2	6.91
					4	1	3	9.93
					4	2	3	8.83
					4	3	3	7.9
					4	4	3	6.9
	Ph	To				T1				T2				T3
	Days	R1	R2	R3	Mean	R1	R2	R3	Mean	R1	R2	R3	Mean	R1	R2	R3	Mean
	0	5.95	5.96	5.95	5.95333	5.96	5.96	5.98	5.96667	5.94	5.95	5.94	5.94333	5.98	5.97	5.98	5.97667
	7	5.77	5.78	5.79	5.78	5.82	5.78	5.78	5.79333	5.65	5.67	5.69	5.67	5.59	5.58	5.59	5.58667
	14	5.46	5.47	5.46	5.46333	5.69	5.71	5.72	5.70667	5.36	5.36	5.38	5.36667	5.46	5.45	5.46	5.45667
	21	5.41	5.4	5.4	5.40333	5.6	5.6	5.61	5.60333	5.2	5.21	5.2	5.20333	5.21	5.41	5.31	5.31
					Treatment	Time	Replicates	Data
					1	1	1	5.95
					1	2	1	5.77
					1	3	1	5.46
					1	4	1	5.41
					1	1	2	5.96
					1	2	2	5.78
					1	3	2	5.47
					1	4	2	5.4
					1	1	3	5.95
					1	2	3	5.79
					1	3	3	5.46
					1	4	3	5.4
					2	1	1	5.96
					2	2	1	5.82
					2	3	1	5.69
					2	4	1	5.6
					2	1	2	5.96
					2	2	2	5.78
					2	3	2	5.71
					2	4	2	5.6
					2	1	3	5.98
					2	2	3	5.78
					2	3	3	5.72
					2	4	3	5.61
					3	1	1	5.94
					3	2	1	5.65
					3	3	1	5.36
					3	4	1	5.2
					3	1	2	5.95
					3	2	2	5.67
					3	3	2	5.36
					3	4	2	5.21
					3	1	3	5.94
					3	2	3	5.69
					3	3	3	5.38
					3	4	3	5.2
					4	1	1	5.98
					4	2	1	5.59
					4	3	1	5.46
					4	4	1	5.21
					4	1	2	5.98
					4	2	2	5.58
					4	3	2	5.45
					4	4	2	5.41
					4	1	3	5.97
					4	2	3	5.59
					4	3	3	5.46
					4	4	3	5.31
