# Supplementary material for: Supplementation of banana peel powder for the development of functional broiler nuggets
Source: PeerJ. 2022 Nov 29;10:e14364. doi: 10.7717/peerj.14364 (PMC9744146; doi:10.7717/peerj.14364)
Supplement: Supplemental Information 2 [file peerj-10-14364-s002.xlsx]

## Sheet: Sheet1
								Product Analysis
	1
	Moisture	To				T1				T2				T3
	Days	R1	R2	R3	Mean	R1	R2	R3	Mean	R1	R2	R3	Mean	R1	R2	R3	Mean
	0	71.06	70.1	70.37	70.51	69.25	69.16	70.71	69.7067	67.82	69.16	69.09	68.69	68.33	67.1	67.39	67.6067
	7	69	69.1	68	68.7	68.52	67.7	67.32	67.8467	65.68	66.39	66	66.0233	65.04	65	65.7	65.2467
	14	67.96	66.13	69.52	67.87	66.56	67.32	66.43	66.77	65.68	65.39	66	65.69	64.3	65.98	64.7	64.9933
	21	66.99	66.13	67.52	66.88	65.49	65.34	66.13	65.6533	65.37	64.8	64.46	64.8767	63.5	64.7	63.7	63.9667
	2
	Fat	To				T1				T2				T3
	Days	R1	R2	R3	Mean	R1	R2	R3	Mean	R1	R2	R3	Mean	R1	R2	R3	Mean
	0	9.27	9.24	9.24	9.25	7.34	7.35	7.37	7.35333	5.6	5.63	5.58	5.60333	4.52	4.5	4.52	4.51333
	7	9.26	9.25	9.24	9.25	7.33	7.35	7.33	7.33667	5.59	5.6	5.57	5.58667	4.5	4.52	4.5	4.50667
	14	9.23	9.24	9.26	9.24333	7.39	7.32	7.32	7.34333	5.59	5.6	5.59	5.59333	4.49	4.5	4.51	4.5
	21	9.23	9.24	9.21	9.22667	7.32	7.35	7.33	7.33333	5.56	5.58	5.59	5.57667	4.5	4.49	4.48	4.49
	3
	Ash	To				T1				T2				T3
	Days	R1	R2	R3	Mean	R1	R2	R3	Mean	R1	R2	R3	Mean	R1	R2	R3	Mean
	0	2.53	2.48	2.52	2.51	4.31	4.31	4.42	4.34667	5.54	5.5	5.6	5.54667	6.43	6.44	6.45	6.44
	7	2.53	2.54	2.49	2.52	4.34	4.42	4.33	4.36333	5.6	5.53	5.55	5.56	6.44	6.46	6.46	6.45333
	14	2.51	2.52	2.52	2.51667	4.37	4.37	4.36	4.36667	5.56	5.57	5.59	5.57333	6.45	6.45	6.44	6.44667
	21	2.53	2.53	2.52	2.52667	4.37	4.37	4.36	4.36667	5.57	5.58	5.58	5.57667	6.46	6.46	6.45	6.45667
	4
	Protein	To				T1				T2				T3
	Days	R1	R2	R3	Mean	R1	R2	R3	Mean	R1	R2	R3	Mean	R1	R2	R3	Mean
	0	13.73	13.7	13.7	13.71	12.8	12.81	12.83	12.8133	10.1	10.15	10.12	10.1233	8.93	8.9	8.93	8.92
	7	12.62	12.64	12.61	12.6233	11.77	11.79	11.77	11.7767	9.22	9.2	9.23	9.21667	7.85	7.82	7.83	7.83333
	14	11.71	11.7	11.73	11.7133	10.77	10.7	10.7	10.7233	8.1	8.12	8.13	8.11667	6.81	6.8	6.9	6.83667
	21	10.65	10.66	10.63	10.6467	9.66	9.69	9.67	9.67333	7.1	7	7.44	7.18	5.92	5.91	5.9	5.91
	5
	Fiber	To				T1				T2				T3
	Days	R1	R2	R3	Mean	R1	R2	R3	Mean	R1	R2	R3	Mean	R1	R2	R3	Mean
	0	0.51	0.52	0.51	0.513333	1	0.9	1	0.966667	1.61	1.65	1.62	1.62667	2.13	2.13	2.12	2.12667
	7	0.5	0.51	0.52	0.51	0.95	0.99	0.95	0.963333	1.6	1.62	1.63	1.61667	2.11	2.12	2.12	2.11667
	14	0.5	0.5	0.51	0.503333	0.96	0.94	0.97	0.956667	1.62	1.6	1.6	1.60667	2.11	2.1	2.11	2.10667
	21	0.51	0.5	0.5	0.503333	0.95	0.96	0.95	0.953333	1.6	1.61	1.6	1.60333	2	2.2	2.1	2.1
	6
	C.Y	To				T1				T2				T3
	Days	R1	R2	R3	Mean	R1	R2	R3	Mean	R1	R2	R3	Mean	R1	R2	R3	Mean
	0	83	83.4	83.2	83.2	85.4	85.4	85	85.2667	87	86.8	86.8	86.8667	87.8	87.6	87.8	87.7333
	7	84.8	85	84.8	84.8667	86.6	86.6	86.8	86.6667	87.6	87.4	87.4	87.4667	88.4	88.6	88.2	88.4
	14	85.4	85.6	85.2	85.4	87.4	87.2	87	87.2	89	88.8	88.8	88.8667	89.8	89.8	89.6	89.7333
	21	86.8	87	86.8	86.8667	88.6	88.6	88.4	88.5333	89.6	89.6	89.8	89.6667	91	90.8	90.6	90.8
	7
	Ph	To				T1				T2				T3
	Days	R1	R2	R3	Mean	R1	R2	R3	Mean	R1	R2	R3	Mean	R1	R2	R3	Mean
	0	5.95	5.96	5.95	5.95333	5.96	5.96	5.98	5.96667	5.94	5.95	5.94	5.94333	5.98	5.97	5.98	5.97667
	7	5.77	5.78	5.79	5.78	5.82	5.78	5.78	5.79333	5.65	5.67	5.69	5.67	5.59	5.58	5.59	5.58667
	14	5.46	5.47	5.46	5.46333	5.69	5.71	5.72	5.70667	5.36	5.36	5.38	5.36667	5.46	5.45	5.46	5.45667
	21	5.41	5.4	5.4	5.40333	5.6	5.6	5.61	5.60333	5.2	5.21	5.2	5.20333	5.21	5.41	5.31	5.31
	8
	TBA	To				T1				T2				T3
	Days	R1	R2	R3	Mean	R1	R2	R3	Mean	R1	R2	R3	Mean	R1	R2	R3	Mean
	0	0.2	0.17	0.17	0.18	0.18	0.15	0.16	0.163333	0.13	0.15	0.18	0.153333	0.15	0.12	0.15	0.14
	7	0.55	0.53	0.54	0.54	0.23	0.25	0.23	0.236667	0.23	0.24	0.21	0.226667	0.21	0.21	0.23	0.216667
	14	1.01	1.02	1.04	1.02333	0.38	0.31	0.31	0.333333	0.32	0.33	0.32	0.323333	0.31	0.3	0.32	0.31
	21	1.52	1.54	1.55	1.53667	0.45	0.46	0.48	0.463333	0.44	0.45	0.43	0.44	0.45	0.46	0.44	0.45
	9
	Microbial	To				T1				T2				T3
	Days	R1	R2	R3	Mean	R1	R2	R3	Mean	R1	R2	R3	Mean	R1	R2	R3	Mean
	0	2.74	2.71	2.71	2.72	2.77	2.74	2.75	2.75333	2.53	2.51	2.5	2.51333	2.37	2.36	2.36	2.36333
	7	3.63	3.65	3.62	3.63333	3.08	3	3.08	3.05333	2.97	2.96	2.97	2.96667	2.86	2.83	2.84	2.84333
	14	4.72	4.71	4.74	4.72333	3.98	3.98	3.91	3.95667	3.11	3.13	3.14	3.12667	3.12	3.11	3.2	3.14333		8.6	7.8	7.6	7.2
	21	5.66	5.67	5.64	5.65667	4.07	4.09	4.08	4.08	3.9	3.76	3.77	3.81	3.93	3.92	3.91	3.92		8	8.4	7.8	7.4
																			7.6	8.2	7.8	7.6
																			7.8	8.4	7.8	7.4
	10																		7.8	8	7.6	7.2
	Color	To						T1						T2						T3
	Days	R1	R2	R3	R4	R5	Mean	R1	R2	R3	R4	R5	Mean	R1	R2	R3	R4	R5	Mean	R1	R2	R3	R4	R5	Mean
	0	8	8	9	9	9	8.6	8	8	8	7	8	7.8	8	8	8	7	7	7.6	7	8	7	7	7	7.2
	7	9	9	9	8	8	8.6	9	8	7	7	8	7.8	8	8	7	7	8	7.6	8	6	7	7	8	7.2
	14	9	8	9	8	9	8.6	8	7	8	8	8	7.8	7	7	7	8	8	7.4	6	8	8	7	7	7.2
	21	9	8	9	8	9	8.6	8	9	7	8	7	7.8	7	8	8	8	7	7.6	6	8	7	7	7	7
	Flavor	To						T1						T2						T3
	Days	R1	R2	R3	R4	R5	Mean	R1	R2	R3	R4	R5	Mean	R1	R2	R3	R4	R5	Mean	R1	R2	R3	R4	R5	Mean
	0	8	8	8	8	9	8.2	8	8	9	9	8	8.4	8	8	8	8	8	8	7	8	8	8	7	7.6
	7	8	8	8	8	8	8	9	8	8	9	8	8.4	8	8	7	8	8	7.8	7	8	7	7	8	7.4
	14	7	8	7	8	9	7.8	8	9	8	8	8	8.2	8	8	8	7	7	7.6	7	7	7	8	7	7.2
	21	8	8	7	7	8	7.6	8	8	8	8	8	8	7	8	7	8	7	7.4	7	7	7	7	7	7
	Tenderness	To						T1						T2						T3
	Days	R1	R2	R3	R4	R5	Mean	R1	R2	R3	R4	R5	Mean	R1	R2	R3	R4	R5	Mean	R1	R2	R3	R4	R5	Mean
	0	8	8	8	8	7	7.8	8	8	9	9	8	8.4	8	8	8	8	8	8	7	8	8	8	8	7.8
	7	8	8	7	7	8	7.6	9	8	8	8	8	8.2	8	8	7	8	8	7.8	7	8	8	7	8	7.6
	14	7	7	8	7	8	7.4	8	9	8	8	8	8.2	8	8	7	8	7	7.6	7	6	8	8	8	7.4
	21	7	8	7	7	7	7.2	8	8	8	8	8	8	7	8	8	7	7	7.4	7	7	7	8	8	7.4
	Juciness	To						T1						T2						T3
	Days	R1	R2	R3	R4	R5	Mean	R1	R2	R3	R4	R5	Mean	R1	R2	R3	R4	R5	Mean	R1	R2	R3	R4	R5	Mean
	0	8	8	8	8	8	8	8	9	9	9	8	8.6	8	8	8	8	8	8	7	8	8	8	8	7.8
	7	8	8	7	8	8	7.8	9	8	9	8	8	8.4	8	8	7	8	8	7.8	7	8	8	7	7	7.4
	14	8	7	7	8	8	7.6	8	9	8	8	8	8.2	8	8	7	8	7	7.6	7	7	8	7	7	7.2
	21	7	8	8	7	7	7.4	8	8	8	8	8	8	7	8	8	7	7	7.4	7	7	7	7	7	7
	Acceptability	To						T1						T2						T3
	Days	R1	R2	R3	R4	R5	Mean	R1	R2	R3	R4	R5	Mean	R1	R2	R3	R4	R5	Mean	R1	R2	R3	R4	R5	Mean
	0	8	8	8	8	8	8	8	9	8	8	8	8.2	8	7	8	8	8	7.8	7	7	7	8	8	7.4
	7	8	8	7	8	8	7.8	8	8	8	8	8	8	8	7	7	8	8	7.6	7	7	8	7	7	7.2
	14	8	7	7	7	8	7.4	8	7	8	8	8	7.8	8	8	7	7	7	7.4	7	7	7	7	7	7
	21	7	8	7	6	7	7	8	8	7	7	8	7.6	7	8	7	7	7	7.2	7	7	6	6	7	6.6
	11
	C.L	To				T1				T2				T3
	Days	R1	R2	R3	Mean	R1	R2	R3	Mean	R1	R2	R3	Mean	R1	R2	R3	Mean
	0	20.48	19.9	20.19	20.19	17.1	17.1	17.65	17.2833	14.94	15.21	15.21	15.12	13.9	14.16	13.9	13.9867
	7	17.92	17.65	17.92	17.83	15.47	15.47	15.21	15.3833	14.16	14.42	14.42	14.3333	13.12	12.87	13.38	13.1233
	14	17.1	16.82	17.37	17.0967	14.42	14.68	14.94	14.68	12.36	12.61	12.61	12.5267	11.36	11.36	11.61	11.4433
	21	15.21	14.94	15.21	15.12	12.87	13.12	13.12	13.0367	11.61	11.61	11.36	11.5267	9.89	10.13	10.38	10.1333
	12
	TPC	To				T1				T2				T3
	Days	R1	R2	R3	Mean	R1	R2	R3	Mean	R1	R2	R3	Mean	R1	R2	R3	Mean
	0	3.72	3.72	3.75	3.73	6.12	6.15	6.13	6.13333	7.26	7.22	7.23	7.23667	8.51	8.54	8.54	8.53
	7	3.19	4.11	3.48	3.59333	5.61	5.61	5.63	5.61667	6.76	6.78	6.79	6.77667	7.99	8	7.98	7.99
	14	2.74	2.73	2.76	2.74333	5.07	5.07	5.12	5.08667	6.21	6.23	6.24	6.22667	7.76	7.77	7.74	7.75667
	21	2.21	2.22	2.19	2.20667	4.56	4.57	4.59	4.57333	5.49	5.58	5.93	5.66667	7.04	7.05	7.03	7.04
	13
	WHC	To				T1				T2				T3
	Days	R1	R2	R3	Mean	R1	R2	R3	Mean	R1	R2	R3	Mean	R1	R2	R3	Mean
	0	6.73	6.7	6.7	6.71	7.8	7.81	7.83	7.81333	8.1	8.15	8.12	8.12333	9.93	9.9	9.93	9.92
	7	5.62	5.64	5.61	5.62333	6.77	6.79	6.77	6.77667	7.22	7.2	7.23	7.21667	8.85	8.82	8.83	8.83333
	14	4.71	4.7	4.73	4.71333	5.77	5.7	5.7	5.72333	6.1	6.12	6.13	6.11667	7.81	7.8	7.9	7.83667
	21	3.65	3.66	3.63	3.64667	4.66	4.69	4.67	4.67333	5.1	5	5.44	5.18	6.92	6.91	6.9	6.91
	Carb.	To				T1				T2				T3
	Days	R1	R2	R3	Mean	R1	R2	R3	Mean	R1	R2	R3	Mean	R1	R2	R3	Mean
	0	2.9	3.96	3.66	3.50667	5.3	5.47	3.67	4.81333	9.33	7.91	7.99	8.41	9.66	10.93	10.59	10.3933
	7	6.09	5.96	7.14	6.39667	7.09	7.75	8.3	7.71333	12.31	11.66	12.02	11.9967	14.06	14.08	13.39	13.8433
	14	8.09	9.91	6.46	8.15333	9.95	9.35	10.22	9.84	13.45	13.72	13.09	13.42	15.84	14.17	15.34	15.1167
	21	10.09	10.94	9.62	10.2167	12.21	12.29	11.56	12.02	14.8	15.43	15.33	15.1867	17.62	16.24	17.37	17.0767
					Treatment	Time	Replicates	Data
					1	1	1	2.9
					1	2	1	6.09
					1	3	1	8.09					Day 21
					1	4	1	10.09			Treatrments	Color	Flavour	Tenderness	Juiciness	Overall acceptability
					1	1	2	3.96			Control	8.6	7.6	7.2	7.4	7
					1	2	2	5.96			T1	7.8	8	8	8	7.6
					1	3	2	9.91			T2	7.6	7.4	7.4	7.4	7.2
					1	4	2	10.94			T3	7	7	7.4	7	6.6
					1	1	3	3.66
					1	2	3	7.14
					1	3	3	6.46					Day 14
					1	4	3	9.62			Treatrments	Color	Flavour	Tenderness	Juiciness	Overall acceptability
					2	1	1	5.3			Control	8.6	7.8	7.4	7.6	7.4
					2	2	1	7.09			T1	7.8	8.2	8.2	8.2	7.8
					2	3	1	9.95			T2	7.4	7.6	7.6	7.6	7.4
					2	4	1	12.21			T3	7.2	7.2	7.4	7.2	7
					2	1	2	5.47
					2	2	2	7.75
					2	3	2	9.35					Day 0
					2	4	2	12.29			Treatrments	Color	Flavour	Tenderness	Juiciness	Overall acceptability
					2	1	3	3.67			Control	8.6	8.2	7.8	8	8
					2	2	3	8.3			T1	7.8	8.4	8.4	8.6	8.2
					2	3	3	10.22			T2	7.6	8	8	8	7.8
					2	4	3	11.56			T3	7.2	7.6	7.8	7.8	7.4
					3	1	1	9.33
					3	2	1	12.31
					3	3	1	13.45					Day 7
					3	4	1	14.8			Treatrments	Color	Flavour	Tenderness	Juiciness	Overall acceptability
					3	1	2	7.91			Control	8.6	8	7.6	7.8	7.8
					3	2	2	11.66			T1	7.8	8.4	8.2	8.4	8
					3	3	2	13.72			T2	7.6	7.8	7.8	7.8	7.6
					3	4	2	15.43			T3	7.2	7.4	7.6	7.4	7.2
					3	1	3	7.99
					3	2	3	12.02
					3	3	3	13.09
					3	4	3	15.33
					4	1	1	9.66
					4	2	1	14.06
					4	3	1	15.84
					4	4	1	17.62
					4	1	2	10.93
					4	2	2	14.08
					4	3	2	14.17
					4	4	2	16.24
					4	1	3	10.59
					4	2	3	13.39
					4	3	3	15.34
					4	4	3	17.37
